## Über die Verteilung von *Mallotus villosus* im Barentsmeer.

Von

S. Awerinzew,  
Moskau.

Das Problem der räumlichen und zeitlichen Verteilung der Fische, anders gesagt, das Problem der Wanderung der Fische ist von enormer Bedeutung; es muss jedoch anerkannt werden, dass die Aufklärung der Frage des öfteren mit sehr bedeutenden Schwierigkeiten verbunden ist und grosse Kosten erfordert. In einigen Fällen aber und zwar bei gut entwickelter Fischerei, wo dabei mehr oder minder regelmässige Untersuchung der Fänge ermöglicht ist, lassen sich parallel zahlreiche äusserst wichtige Daten von grossem Interesse ermitteln.

Welch höchst interessantes Material stellt z. B. die Nahrung des Kabeljaus dar. Ich besitze derartiges in verschiedenen Jahren gesammeltes Material, das sich auf die Ernährung des Barentsmeer-Kabeljaus bezieht. Auf Grund dieses Materials habe ich den Versuch gemacht, die Frage der Verteilung von *Mallotus villosus* im offenen Meer aufzuklären. Wie sich erweist, kommt diesen Fischen eine bedeutende Rolle in der Ernährung von *Gadus morrhua* (*callarias*) zu, ein Umstand, der das Interesse für diese Art in grossem Masse erhöht.

Aus den beigefügten vier Karten lässt sich die Verteilung von *Mallotus villosus* im südlichen Teile des Barentsmeeres zu verschiedenen Jahreszeiten ersehen. Im Januar ist der Fisch noch zahlreich. Einzelne Schwärme ziehen vom Osten her dem Südwesten zu und begeben sich teilweise sogar in südlicher Richtung, der Insel Kyldin und der Halbinsel Rybatschij sich nähernd. Im Februar bewegen sie sich in eben derselben Richtung, aber die Schwärme werden dichter und dabei auch zahlreicher. Im Rybatschij und Kyldin Gebiete sammeln sich die Fische in ziemlich bedeutender Weise an. Ähnliche Ansammlungen werden ebenfalls gegen Finmarken und mitunter auch in nördlicher Richtung vorgefunden. Vielleicht gelangen die Schwärme dort hin nicht von Osten sondern direkt von Norden her. Im März und April hält sich *M. villosus* in dichten Scharen zwischen Finmarken, der Halbinsel Rybatschij und dem östlich von der Insel Kyldin gelegenen Gebiete im offenen Meer auf. In nördlicher Richtung tritt der Fisch um diese



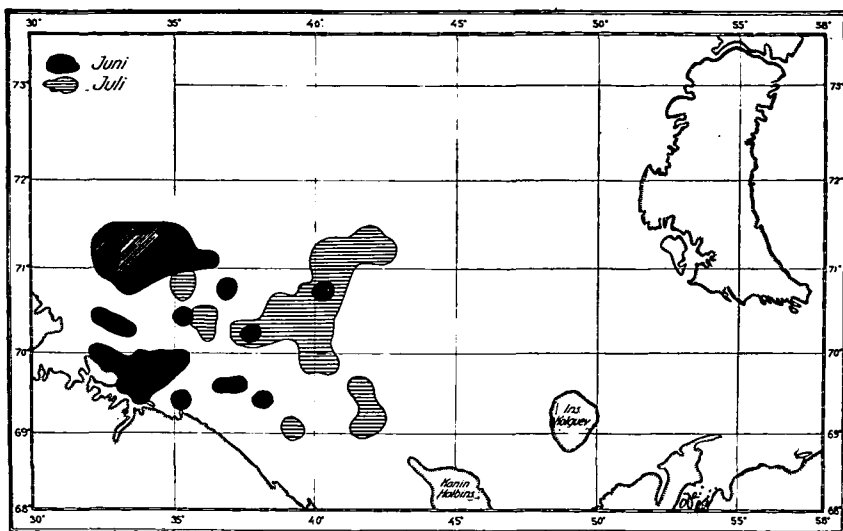

III

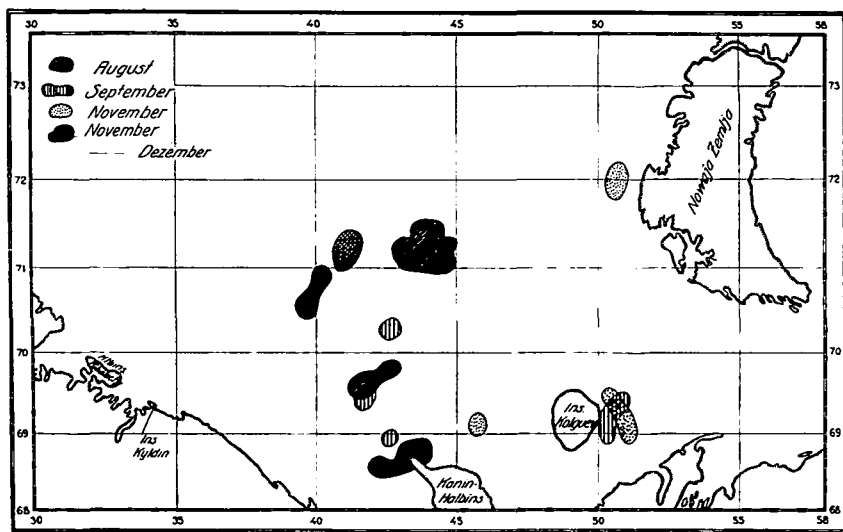

IV

Karte der Verteilung von *M. villosus* im Barentsmeer während der Monate Januar—März (I), April—Mai (II), Juni—Juli (III), August—Dezember (IV).

und der Halbinsel Rybatschij beobachtet wird, schon nicht mehr ermitteln. Einzelne Schwärme halten sich noch nördlich von Kylden und Rybatschij auf, andere begeben sich weiter nordwärts und ferner sondern sich von diesen und jenen wieder andere Schwärme ab, die sich in östlicher Richtung bewegen.

Äusserst interessant ist die Verteilung von *M. villosus* im Juli. An den Stellen, wo in den früheren Monaten die grössten Massen der

Fische auftraten, kommt diese Art jetzt nicht mehr vor. Die Fische sind weiter ostwärts gerückt. Vereinzelte Schwärme halten sich noch in ziemlicher Nähe der Küstenregionen auf, aber die meisten sind nördlich gerückt und sind auch weniger dicht geworden. Nach und nach zerstreuen sich die Fische immer mehr; dichte Schwärme werden selten. Im August haben sie sich nach allen Seiten hin zerstreut und treten sehr selten in grösseren Mengen auf. Solche Schwärme werden am Nord-Eingange der Meerenge, die das Barentsmeer mit dem Weissen Meer verbindet, angetroffen; mitunder werden sie östlich vom Cap Kanin-Meridian vorgefunden. Besonders eigenartig ist der Umstand, dass wir im August, unter anderen, *M. villosus* in unmittelbarer Nähe der Küste der Halbinsel Kanin — vorwiegend in der Region von Kanin Noss — vorfinden. Im September zerstreuen sich die Fische noch stärker als im August; nur vereinzelt sehr kleine Schwärme werden da angetroffen, wo sie im August vorkamen. Die Art lässt sich auch an den Ufern der Insel Kolguyew, vorwiegend an deren östlicher Küste, vorfinden. Im Oktober ist *M. villosus* am stärksten zerstreut und es ist unmöglich, irgend welche Gebiete ihres Vorkommens auf der Karte zu vermerken. Im November kommt der Fisch wiederum scharenweise vor, die Schwärme werden an der Küste der Nowaja Zemlja, bei der Insel Kolguyew, im Gebiete der Halbinsel Kanin und weiter in nordwestlicher Richtung angetroffen. Im December kommt *M. villosus* an den Stellen vor, die als die am meisten östlich gelegenen Punkte der Januaransammlung dieses Fisches festgestellt worden sind.

Dies also ist das Bild von der Verteilung von *M. villosus*. Es ist selbstverständlich nur in grossen Linien gegeben. Weiteres Material über die Ernährung von *Gadus morrhua* wird wohl noch mehr Einzelheiten des hier skizzierten Bildes der Wanderungen von *M. villosus* bringen.

Meines Erachtens ist es unzweifelhaft, dass diese Verteilung von *M. villosus* in direkter oder indirekter Weise mit der Verteilung der Temperaturen des Seewassers verknüpft ist, sie steht also mit den Strömungen und wohl auch mit der Verbreitung einiger Planktonorganismen in Zusammenhang. An der Hand aller dieser Daten wird es wohl, scheint mir, möglich sein, die entsprechenden Gesetzmässigkeiten ohne grosse Schwierigkeiten zu ermitteln. Wenn wir derartige Karten von *M. villosus* Migrationen für 2—3 Dekaden besässen, so liessen sich aus ihrer Zusammenstellung bemerkenswerte Schlüsse bezüglich der Periodizität und des Rhythmus verschiedener im Meere sich abspielender Erscheinungen ziehen.
